# Supplementary material for: Effect of a Peer Comparison and Educational Intervention on Medical Test Conversation Quality: A Randomized Clinical Trial
Source: PubMed Central journal article supplement (PMC10636635; doi:10.1001/jamanetworkopen.2023.42464), 2023-11-09
Supplement: jamanetwopen-e2342464-s001.pdf [file jamanetwopen-e2342464-s001.pdf]

1 **Supplementary Material 1: Trial protocol and statistical analysis plan**

2

3 **Table of Contents**

4 Original Protocol ..... 2

5 Final Protocol ..... 15

6 Statistical Analysis Plan ..... 29

7

8

9 **Original Protocol**

10

11 **PRINCIPAL/OVERALL INVESTIGATOR**

12 Ishani Ganguli MD MPH

13

14 **PROTOCOL TITLE**

15 CASCADES Trial: A consumer-focused approach to initiate shared decision-  
16 making on care cascades after common medical tests

17

18 **FUNDING**

19 Robert Wood Johnson Foundation

20

21 **VERSION DATE**

22 3/24/2021

23

24 **SPECIFIC AIMS**

25

Concisely state the objectives of the study and the hypothesis being tested.

26 **Aims:**

- 27 1. Develop a simple, scalable intervention to prompt conversations about  
28 the downstream consequences of potentially discretionary medical tests  
29 in the primary care setting.  
30 2. Implement this text-based intervention in the primary care setting.  
31 3. Rigorously evaluate the impact of this intervention using a randomized  
32 controlled trial study of 200 patients by their primary care physician.  
33

34 **Hypotheses:**

- 35 1. The intervention is feasible to implement in primary care practices with  
36 no major recruitment barriers as defined by recruiting 20 physicians from  
37 clinics affiliated with one academic medical center, and 200 patients of all  
38 sexes and a range of ages, ethnicities, income levels (as correlated with  
39 zip code), and education levels.  
40 2. Intervention arm patients are more likely to have higher quality  
41 conversations about medical testing decisions (primary outcome).  
42

43 **BACKGROUND AND SIGNIFICANCE**

44 Provide a brief paragraph summarizing prior experience important for understanding the  
45 proposed study and procedures.

46 Medical tests can have sizable downstream consequences including further  
47 tests, treatments, office visits, and even hospitalizations. Known as *care*  
48 *cascades*, these downstream services have significant direct and indirect  
49 cost implications for patients. In some cases, downstream services are  
50 medically appropriate, such as when an initial test is medically indicated and  
51 has a high degree of accuracy. However, many tests are performed even  
52 when they are not medically indicated (e.g., at a patient’s request), and may  
53 have high rates of false positives or of incidental findings (i.e., unrelated to  
54 the purpose of the test). Notably, the following tests are commonly ordered,  
55 may be overused, and have a high risk of false positives and incidental  
56 findings (and therefore care cascades): imaging tests, electrocardiograms,  
57 and blood tests including blood count, electrolyte, kidney function, and liver  
58 function tests. Some estimates suggest that up to 52% of radiology and  
59 laboratory tests produce incidental findings, and that rate may increase with  
60 advances in technology.

61  
62 Studies of specific cascades using national administrative claims data also  
63 suggest that these cascades can be costly – in one example by Ganguli et al,  
64 cascades following pre-operative electrocardiograms for cataract surgery  
65 cost ten times the initial electrocardiograms (ECGs). A recent national study  
66 of US internists conducted by Ganguli et al. also found that almost all  
67 responding physicians had experienced cascades after incidental findings  
68 that did not lead to clinically meaningful outcomes yet caused physical,  
69 psychological, or other harms to patients or the physicians themselves.  
70 Although some of these cascades may eventually reveal clinically important  
71 findings, more often they find nothing significant. This is especially true  
72 when the initial test is discretionary or even known to be of low-value, as in  
73 the example of pre-operative ECGs for cataract surgery. It is likely that few  
74 patients are aware of the potential for cascades or risk of false positives  
75 when making the decision with their clinicians to proceed with medical  
76 tests.

77  
78 Despite the prevalence and burden of care cascades, little effort has been  
79 devoted to addressing them. Consideration of care cascades have not been  
80 incorporated into best practices for shared decision-making and we are not

81 aware of any interventions that have been developed or evaluated to  
82 educate patients or clinicians on the financial or psychological risk of  
83 care cascades.

84

## 85 **RESEARCH DESIGN AND METHODS**

86 Briefly describe study design and anticipated enrollment, i.e., number of subjects to be enrolled  
87 by researchers study-wide and by Partners researchers. Provide a brief summary of the  
88 eligibility criteria (for example, age range, gender, medical condition). Include any local site  
89 restrictions, for example, “Enrollment at Partners will be limited to adults although the  
90 sponsor’s protocol is open to both children and adults.”

91 **Design:** During Phase I, we will implement a user-centered design process  
92 to develop the educational content and implementation strategy for the  
93 intervention. Specifically, we will conduct focus groups with patients and  
94 clinicians in which we iteratively solicit feedback on the language and  
95 dissemination of text/email-based messages and interactive content for  
96 patients, on the tip sheet for physicians, and on survey items for both.

97

98 In Phase II, we will randomize 20 primary care physicians to intervention  
99 and control arms, recruit 10 patients per physician with upcoming wellness  
100 visits, and implement our intervention. We will collect pre- and post-  
101 intervention surveys of patients and physicians, as well as post-study  
102 interviews of patients and physicians. In Phase III, we will use mixed  
103 methods analysis to study the data collected in Phase II.

104

105 **Enrollment:** For Phase I, we will recruit up to 20 patients for the patient  
106 advisory committee and interviews and up to 20 practicing BWH primary  
107 care physicians for interviews.

108

109 For phase II, we will recruit 20 BWH primary care physicians who actively  
110 see patients and meet our inclusion criteria (based on patient-deidentified  
111 EDW data on test ordering rates during annual physicals). We will then  
112 recruit 10 patients for each of these PCPs. All patients of the selected PCPs  
113 who are at least 18 years old, speak English, and have access to Email are  
114 eligible to participate.

115 Briefly describe study procedures. Include any local site restrictions, for example, "Subjects  
116 enrolled at Partners will not participate in the pharmacokinetic portion of the study." Describe  
117 study endpoints.

118 In phase I, we will develop educational content for patients and a tip sheet  
119 for providers. To this end, we will work with the BWH Center for Patients and  
120 Families to select and convene a 5-10 member patient advisory council. We  
121 will host two focus groups with this council, aided by discussion guides, to  
122 first identify key issues and then to suggest refinements to our intervention.

123

124 We will also recruit both patients and physicians for in-depth interviews. We  
125 will recruit up to 20 primary care physicians through the Patient-Based  
126 Research Network (PBRN) and suggestions from clinic medical directors. We  
127 will recruit up to 20 patients through the above Patient Advisory Council and  
128 the Rally platform. We will conduct up to 20 in-depth interviews each with  
129 these physicians and patients to understand their experiences with cascades  
130 and to cognitively test survey items.

131

132 Finally, we will review patient educational materials and the clinician tip  
133 sheet with clinic medical directors for their approval.

134

135 In phase II, we will work with clinic leads in the BWH PBRN to recruit 20  
136 physicians who have not previously been involved. We will select these  
137 physicians from among those who fall in the top 50<sup>th</sup> percentile of test  
138 ordering rates during annual physicals. We will use matched pair  
139 randomization to randomize these PCPs to the control or intervention arms.  
140 For each physician, we will identify 10 of their patients who are scheduled  
141 for a physical in the next 6 months and meet our inclusion criteria (based on  
142 key demographics from the electronic health record (EHR)). We will recruit  
143 them using use mailed letters and patient portal messages.

144

145 Intervention arm: We will send emails to physicians with feedback on how  
146 they compare to their peers in aggregate on test ordering during annual  
147 physicals, along with links to the physician-facing materials. We will not  
148 share identifiable data with a given physician on their peer physicians. One  
149 to two days before their visit, we will send patients educational materials via  
150 text, email, or both depending on their preference.

151

152 Control arm: One to two days before their visit, we will send patients general  
153 information on visit preparation.

154

155 **NOTE:** We acknowledge that during the covid19 pandemic, clinical  
156 operations have changed drastically to protect both patients and health care  
157 workers. For instance, routine wellness visits have been cancelled or  
158 converted to virtual. Given our commitment to protect the safety and  
159 welfare of our study subjects and staff, and to avoid disrupting clinic  
160 operations during this challenging time, we plan to conduct phase I of our  
161 study virtually and to begin the intervention phase only once it is deemed  
162 safe and feasible to do so.

163

164

165 For studies involving treatment or diagnosis, provide information about standard of care at  
166 Partners (e.g., BWH, MGH) and indicate how the study procedures differ from standard care.  
167 Provide information on available alternative treatments, procedures, or methods of diagnosis.

168

169 Treatment and diagnosis are not part of this protocol.

170

171 Describe how risks to subjects are minimized, for example, by using procedures which are  
172 consistent with sound research design and which do not unnecessarily expose subjects to risk  
173 or by using procedures already being performed on the subject for diagnostic or treatment  
174 purposes.

175

176 There are no known risks to participating in this study. Patient and clinician  
177 subjects may voluntarily participate and withdraw at any time.

178

179 There is a theoretical risk of breach of data confidentiality and that PHI could  
180 become known to unauthorized persons, but we will take all steps necessary  
181 to protect PHI (see below). To mitigate this risk, we will follow all compliance  
182 and data confidentiality procedures for research at Partners. Specifically, we  
183 will use procedures consistent with sound research design and which do not  
184 expose subjects to unnecessary risk. Data monitoring will be conducted  
185 regularly (see below). All data analyzed will be de-identified and reported in  
186 aggregate.

187

188 Describe explicitly the methods for ensuring the safety of subjects. Provide objective criteria  
189 for removing a subject from the study, for example, objective criteria for worsening  
190 disease/lack of improvement and/or unacceptable adverse events. The inclusion of objective  
191 drop criteria is especially important in studies designed with placebo control groups.

192

193 **This is a minimal risk study.** There is no known physical or medical safety  
194 threat to patient or clinician subjects who participate. Furthermore,  
195 participation is voluntary and all subjects will be informed that they may opt-  
196 out any time (see below). Given the minimal risk to subjects, our data safety  
197 and monitoring procedures, and the relatively small sample size, we do not  
198 plan on having drop criteria.

199

#### 200 **FORESEEABLE RISKS AND DISCOMFORTS**

201 Provide a brief description of any foreseeable risks and discomforts to subjects. Include those  
202 related to drugs/devices/procedures being studied and/or administered/performed solely for  
203 research purposes. In addition, include psychosocial risks, and risks related to privacy and  
204 confidentiality. When applicable, describe risks to a developing fetus or nursing infant.

205

206 **For patient and clinician subjects, there are no known risks to**  
207 **participating in our data collection activities.** There is a potential risk of  
208 physicians feeling psychological discomfort in knowing their test ordering  
209 rates. We will mitigate this by offering an option if they have concerns to  
210 speak with clinic leaders about these concerns. The main risks are breach of  
211 confidentiality and privacy of information shared. Every effort will be made  
212 to maintain confidentiality and privacy of information shared and collected  
213 and subsequent data analysis (see below), and efforts will be made to  
214 minimize the duration of data collection activities.

215

#### 216 **EXPECTED BENEFITS**

217 Describe both the expected benefits to individual subjects participating in the research and the  
218 importance of the knowledge that may reasonably be expected to result from the study. Provide  
219 a brief, realistic summary of potential benefits to subjects, for example, "It is hoped that the  
220 treatment will result in a partial reduction in tumor size in at least 25% of the enrolled subjects."  
221 Indicate how the results of the study will benefit future patients with the disease/condition being  
222 studied and/or society, e.g., through increased knowledge of human physiology or behavior,  
223 improved safety, or technological advances.

224  
225 Individual subjects may benefit by learning about (and, if appropriate,  
226 avoiding) possible downstream consequences of medical testing, and having  
227 their physicians become more informed about these consequences and how  
228 to discuss them. Future patients will benefit through improved knowledge of  
229 a possible intervention to facilitate patient-clinician conversations about  
230 cascades that may in turn help to reduce their negative effects.

231  
232 **EQUITABLE SELECTION OF SUBJECTS**

233 The risks and benefits of the research must be fairly distributed among the populations that  
234 stand to benefit from it. No group of persons, for example, men, women, pregnant women,  
235 children, and minorities, should be categorically excluded from the research without a good  
236 scientific or ethical reason to do so. Please provide the basis for concluding that the study  
237 population is representative of the population that stands to potentially benefit from this  
238 research.

239  
240 Our goal will be to enroll eligible patients whose characteristics are  
241 representative of the entire population of eligible patients. We will  
242 specifically target patients of all sexes and a range of ages, ethnicities,  
243 income levels and education levels.

244  
245 When people who do not speak English are excluded from participation in the research, provide  
246 the scientific rationale for doing so. Individuals who do not speak English should not be denied  
247 participation in research simply because it is inconvenient to translate the consent form in  
248 different languages and to have an interpreter present.

249  
250 We will approach English-speaking patients only. The scientific rationale for  
251 this limitation is because the text-based intervention will be available in  
252 English in this early stage of development. All clinician subjects caring for  
253 patients at BWH speak English.

254  
255 For guidance, refer to the following Partners policy:  
256 Obtaining and Documenting Informed Consent of Subjects who do not Speak English  
257 [https://partnershealthcare-public.sharepoint.com/ClinicalResearch/Non-](https://partnershealthcare-public.sharepoint.com/ClinicalResearch/Non-English_Speaking_Subjects.1.10.pdf)  
258 [English\\_Speaking\\_Subjects.1.10.pdf](https://partnershealthcare-public.sharepoint.com/ClinicalResearch/Non-English_Speaking_Subjects.1.10.pdf)

259  
260  
261  
262 **RECRUITMENT PROCEDURES**

263 Explain in detail the specific methodology that will be used to recruit subjects. Specifically  
264 address how, when, where and by whom subjects will be identified and approached about



265 participation. Include any specific recruitment methods used to enhance recruitment of  
266 women and minorities.

267  
268 For phase I, we will recruit the PAC and physician focus groups as described  
269 above.

270  
271 For phase II, we will work with clinic leads in the BWH PBRN to recruit 20  
272 physicians who have not previously been involved with our study. We will  
273 select these physicians from among those who fall in the top 50<sup>th</sup> percentile  
274 of test ordering rates during annual physicals, starting from PCPs with the  
275 highest test ordering rates and proceeding in descending order. Once we  
276 have recruited 20 physicians, we will use matched pair randomization to  
277 randomize these PCPs to the control or intervention arms.

278  
279 Eligible patient participants will then be identified by research assistants  
280 trained in the protection of human subjects based on upcoming appointment  
281 and demographics including age, race, sex, and zip code (to link to area-  
282 level census data on income and education) using “minimum necessary”  
283 information in the EHR. Once identified, the research assistant will send the  
284 patient both a letter through the patient portal and a mailed letter inviting  
285 them to participate on behalf of the BWH PI. In the letter we will include an  
286 email address and phone number that allows the patient to opt out. The  
287 letter will also include a link to REDCAP which will include an electronic  
288 consent form with information sheet, invitation to enroll, preference for  
289 communication (phone versus email), and the baseline survey.

290

291 Provide details of remuneration, when applicable. Even when subjects may derive medical  
292 benefit from participation, it is often the case that extra hospital visits, meals at the hospital,  
293 parking fees or other inconveniences will result in additional out-of-pocket expenses related to  
294 study participation. Investigators may wish to consider providing reimbursement for such  
295 expenses when funding is available

296  
297 Patient subjects in both arms will be compensated \$10 at the completion of  
298 the study. Physician subjects will be compensated \$50 for the whole study.

299

300 For guidance, refer to the following Partners policies:

301 Recruitment of Research Subjects

302 [https://partnershealthcare-](https://partnershealthcare-public.sharepoint.com/ClinicalResearch/Recruitment_Of_Research_Subjects.pdf)  
303 [public.sharepoint.com/ClinicalResearch/Recruitment\\_Of\\_Research\\_Subjects.pdf](https://partnershealthcare-public.sharepoint.com/ClinicalResearch/Recruitment_Of_Research_Subjects.pdf)

304

305 Guidelines for Advertisements for Recruiting Subjects

306 [https://partnershealthcare-](https://partnershealthcare-public.sharepoint.com/ClinicalResearch/Guidelines_For_Advertisements.1.11.pdf)  
307 [public.sharepoint.com/ClinicalResearch/Guidelines\\_For\\_Advertisements.1.11.pdf](https://partnershealthcare-public.sharepoint.com/ClinicalResearch/Guidelines_For_Advertisements.1.11.pdf)

308  
309 Remuneration for Research Subjects

310 [https://partnershealthcare-](https://partnershealthcare-public.sharepoint.com/ClinicalResearch/Remuneration_for_Research_Subjects.pdf)  
311 [public.sharepoint.com/ClinicalResearch/Remuneration\\_for\\_Research\\_Subjects.pdf](https://partnershealthcare-public.sharepoint.com/ClinicalResearch/Remuneration_for_Research_Subjects.pdf)

312

313

### 314 **CONSENT PROCEDURES**

315 Explain in detail how, when, where, and by whom consent is obtained, and the timing of  
316 consent (i.e., how long subjects will be given to consider participation). For most studies  
317 involving more than minimal risk and all studies involving investigational drugs/devices, a  
318 licensed physician investigator must obtain informed consent. When subjects are to be  
319 enrolled from among the investigators' own patients, describe how the potential for coercion  
320 will be avoided.

321

322 In phase I, eligible physician subjects will be informed about our research  
323 initiative via email and patients via RALLY. Prior to participation in  
324 interviews, we will confirm verbal consent. Specifically, these subjects will be  
325 informed that: 1) participation is voluntary—they may stop the interview at  
326 any time, and 2) data collected will be analyzed and reported in aggregate.

327  
328 In phase II, potential patient subjects will be informed as part of the letter  
329 or patient portal message, and the REDCAP link that it will contain. This  
330 information will contain the purpose of the study, risks/benefits, methods of  
331 ensuring confidentiality, and voluntary nature of participation. Specifically,  
332 patient subjects will be informed that: 1) participation is voluntary—they may  
333 withdraw at any time; 2) a decision to not participate will in no way affect  
334 their care at BWH/BWFH; 3) information shared will remain confidential and  
335 used only for research purposes; and 4) data collected will be analyzed and  
336 reported in aggregate. We will not request verbal consent as this will be  
337 prohibitively burdensome for this minimal risk study and because this study  
338 does not share any personal health information with the patients.

339

340 **NOTE:** When subjects are unable to give consent due to age (minors) or impaired decision-  
341 making capacity, complete the forms for Research Involving Children as Subjects of Research

342 and/or Research Involving Individuals with Impaired Decision-making Capacity, available on the  
343 New Submissions page on the PHRC website:

344 <https://partnershealthcare.sharepoint.com/sites/phrmApply/aieipa/irb>

345

346 For guidance, refer to the following Partners policy:

347 Informed Consent of Research Subjects:

348 <https://partnershealthcare->

349 [public.sharepoint.com/ClinicalResearch/Informed\\_Consent\\_of\\_Research\\_Subjects.pdf](https://partnershealthcare-public.sharepoint.com/ClinicalResearch/Informed_Consent_of_Research_Subjects.pdf)

350

351

352

### 353 **DATA AND SAFETY MONITORING**

354 Describe the plan for monitoring the data to ensure the safety of subjects. The plan should  
355 include a brief description of (1) the safety and/or efficacy data that will be reviewed; (2) the  
356 planned frequency of review; and (3) who will be responsible for this review and for  
357 determining whether the research should be altered or stopped. Include a brief description of  
358 any stopping rules for the study, when appropriate. Depending upon the risk, size and  
359 complexity of the study, the investigator, an expert group, an independent Data and Safety  
360 Monitoring Board (DSMB) or others might be assigned primary responsibility for this monitoring  
361 activity.

362

363 NOTE: Regardless of data and safety monitoring plans by the sponsor or others, the principal  
364 investigator is ultimately responsible for protecting the rights, safety, and welfare of subjects  
365 under his/her care.

366

367 The principal investigator and research assistant/project coordinator will  
368 monitor data collection activities, maintain data integrity and quality control,  
369 protect the rights, safety, and welfare of study subjects, and adhere to  
370 standards set by the Partners IRB. All data will be stripped of PHI and  
371 electronic data will be kept on a secured shared file area (SFA) behind the  
372 Partners firewall with anti-virus software or Partners Research Computing  
373 approved cloud storage services. Data about consented patients will also be  
374 stored behind the RAND Corporation firewall in accordance with the terms of  
375 the consent. Any paper forms and/or audio recordings will be destroyed after  
376 being transcribed into electronic format. Monitoring will be performed on a  
377 monthly basis during the study period and will include a review of  
378 enrollment, data analysis, and breaches of confidentiality, and any adverse  
379 events that may occur. Any adverse events will be graded as to their

380 attribution to the intervention and reported according to IRB guidelines. The  
381 principal investigator will review any complaints reported from patient and  
382 physician subjects. These will be reported to the Partners IRB annually or  
383 immediately if the complaint is serious. Given the minimal risk of the study,  
384 we are not planning to use automatic stopping rules or a DSMB. We  
385 emphasize that this study does not involve any invasive procedures.

386

387 Describe the plan to be followed by the Principal Investigator/study staff for review of adverse  
388 events experienced by subjects under his/her care, and when applicable, for review of sponsor  
389 safety reports and DSMB reports. Describe the plan for reporting adverse events to the sponsor  
390 and the Partners' IRB and, when applicable, for submitting sponsor safety reports and DSMB  
391 reports to the Partners' IRBs. When the investigator is also the sponsor of the IND/IDE, include  
392 the plan for reporting of adverse events to the FDA and, when applicable, to investigators at  
393 other sites.

394

395 NOTE: In addition to the adverse event reporting requirements of the sponsor, the principal  
396 investigator must follow the Partners Human Research Committee guidelines for Adverse Event  
397 Reporting

398

399 Voluntary participation in data collection activities are not expected to cause  
400 adverse events to patient or physician subjects. However, if an adverse  
401 event occurs, the principal investigator will follow PHS HRC guidelines for  
402 adverse event reporting.

403

#### 404 **MONITORING AND QUALITY ASSURANCE**

405 Describe the plan to be followed by the principal investigator/study staff to monitor and assure  
406 the validity and integrity of the data and adherence to the IRB-approved protocol. Specify who  
407 will be responsible for monitoring, and the planned frequency of monitoring. For example,  
408 specify who will review the accuracy and completeness of case report form entries, source  
409 documents, and informed consent.

410

411 NOTE: Regardless of monitoring plans by the sponsor or others, the principal investigator is  
412 ultimately responsible for ensuring that the study is conducted at his/her investigative site in  
413 accordance with the IRB-approved protocol, and applicable regulations and requirements of the  
414 IRB.

415

416 The principal investigator and research assistant/project coordinator will  
417 monitor and assure the validity and integrity of the data collection and  
418 adherence to the procedures outlined in this protocol. They will review the

419 study database on a monthly basis, ensuring data integrity, accuracy, and  
420 completeness. The principal investigator will supervise the research  
421 assistant/project coordinator in all data collection activities over the course  
422 of the study.  
423

424 For guidance, refer to the following Partners policies:

425 Data and Safety Monitoring Plans and Quality Assurance

426 [https://partnershealthcare-](https://partnershealthcare-public.sharepoint.com/ClinicalResearch/DSMP%20in%20Human%20Subjects%20Research.pdf)  
427 [public.sharepoint.com/ClinicalResearch/DSMP in Human Subjects Research.pdf](https://partnershealthcare-public.sharepoint.com/ClinicalResearch/DSMP in Human Subjects Research.pdf)

428  
429 Reporting Unanticipated Problems (including Adverse Events)

430 [https://partnershealthcare-](https://partnershealthcare-public.sharepoint.com/ClinicalResearch/Reporting%20Unanticipated%20Problems%20including%20Adverse%20Events.pdf)  
431 [public.sharepoint.com/ClinicalResearch/Reporting Unanticipated Problems including Adverse Even](https://partnershealthcare-public.sharepoint.com/ClinicalResearch/Reporting Unanticipated Problems including Adverse Events.pdf)  
432 [ts.pdf](https://partnershealthcare-public.sharepoint.com/ClinicalResearch/Reporting Unanticipated Problems including Adverse Events.pdf)

## 433 434 435 436 **PRIVACY AND CONFIDENTIALITY**

437 Describe methods used to protect the privacy of subjects and maintain confidentiality of data  
438 collected. This typically includes such practices as substituting codes for names and/or medical  
439 record numbers; removing face sheets or other identifiers from completed  
440 surveys/questionnaires; proper disposal of printed computer data; limited access to study data;  
441 use of password-protected computer databases; training for research staff on the importance of  
442 confidentiality of data, and storing research records in a secure location.  
443

444 NOTE: Additional measures, such as obtaining a Certificate of Confidentiality, should be  
445 considered and are strongly encouraged when the research involves the collection of sensitive  
446 data, such as sexual, criminal or illegal behaviors.

447 All information from individuals or entities in the course of this study that  
448 identifies an individual or entity will be treated as confidential in accordance  
449 with section 903c of the Public Health Service Act (42 U.S.C.299a-1). This  
450 will be done by keeping all personal identifiers in a separate location from  
451 the data, and only approved research personnel and study investigators  
452 trained in the protection of human subjects will have access to the linked  
453 data. All research staff will be properly trained in the importance of  
454 confidentiality of data.  
455

456 All electronic data and files will be stored on a password-protected database  
457 in a shared file area (SFA) on a Partners password-protected computer  
458 behind the Partners firewall with anti-virus software or on Partners Research  
459 Computing approved cloud storage services. Data about consented patients  
460 will also be stored behind the RAND Corporation firewall in accordance with  
461 the terms of the consent. Patients' identifiers and other data collected on  
462 paper will be kept in locked filing cabinets. Data collection instruments used  
463 during the project and stored on laptop or desktop computers will also be  
464 password protected. Printed computer data with PHI will be shredded and  
465 disposed of upon completion of the study and any record-keeping  
466 requirements. Any identifiers will be removed prior to any analysis and all  
467 results will be presented in aggregate. The principal investigator will be  
468 responsible for the confidentiality and security of all study databases. These  
469 measures should be effective in preventing breaches of confidentiality.  
470

471 **SENDING SPECIMENS/DATA TO RESEARCH COLLABORATORS OUTSIDE**  
472 **PARTNERS**

473 Specimens or data collected by Partners investigators will be sent to research collaborators  
474 outside Partners, indicate to whom specimens/data will be sent, what information will be sent,  
475 and whether the specimens/data will contain identifiers that could be used by the outside  
476 collaborators to link the specimens/data to individual subjects.

477

478 No specimens or data will be sent to anyone outside of BWH.

479 Specifically address whether specimens/data will be stored at collaborating sites outside  
480 Partners for future use not described in the protocol. Include whether subjects can withdraw  
481 their specimens/data, and how they would do so. When appropriate, submit documentation of  
482 IRB approval from the recipient institution.

483

484 Not applicable.

485 **RECEIVING SPECIMENS/DATA FROM RESEARCH COLLABORATORS OUTSIDE**  
486 **PARTNERS**

487 When specimens or data collected by research collaborators outside Partners will be sent to  
488 Partners investigators, indicate from where the specimens/data will be obtained and whether  
489 the specimens/data will contain identifiers that could be used by Partners investigators to link  
490 the specimens/data to individual subjects. When appropriate, submit documentation of IRB  
491 approval and a copy of the IRB-approved consent form from the institution where the  
492 specimens/data were collected.

493

494 No specimens or data will be received from anyone outside of BWH.

495

496 **Final Protocol**

497

498 **PRINCIPAL/OVERALL INVESTIGATOR**

499 Ishani Ganguli MD MPH

500

501 **PROTOCOL TITLE**

502 A Multi-pronged Intervention to Initiate Shared Decision-making on Medical  
503 Tests and Care Cascades in the Primary Care Setting

504

505 **FUNDING**

506 Robert Wood Johnson Foundation

507

508 **VERSION DATE**

509 10/27/2022

510

511 **SPECIFIC AIMS**

512 Concisely state the objectives of the study and the hypothesis being tested.

513 **Aims:**

- 514 4. Develop a simple, scalable intervention to prompt conversations about  
515 the downstream consequences of potentially discretionary medical tests  
516 in the primary care setting.
- 517 5. Implement this email and text-based intervention in the primary care  
518 setting.
- 519 6. Rigorously evaluate the impact of this intervention using a randomized  
520 controlled trial study of 20 primary care physicians and at least 200  
521 patients.

522

523 **Hypotheses:**

- 524 3. The intervention is feasible to implement in primary care practices with  
525 no major recruitment barriers as defined by recruiting 20 physicians from  
526 clinics affiliated with one academic medical center, and at least 200  
527 patients of all genders and a range of ages, race/ethnicities, and  
528 education levels.
- 529 4. Intervention arm patients are more likely to have higher quality  
530 conversations about medical testing decisions (primary outcome).

531

532 **BACKGROUND AND SIGNIFICANCE**

533 Provide a brief paragraph summarizing prior experience important for understanding the  
534 proposed study and procedures.

535

536 Medical tests can have sizable downstream consequences including further  
537 tests, treatments, office visits, and even hospitalizations. Known as *care*  
538 *cascades*, these downstream services have significant direct and indirect  
539 cost implications for patients. In some cases, downstream services are  
540 medically appropriate, such as when an initial test is medically indicated and  
541 has a high degree of accuracy. However, many tests are performed even  
542 when they are not medically indicated (e.g., at a patient’s request), and may  
543 have high rates of false positives or of incidental findings (i.e., unrelated to  
544 the purpose of the test). Notably, the following tests are commonly ordered,  
545 may be overused, and have a high risk of false positives and incidental  
546 findings (and therefore care cascades): imaging tests, electrocardiograms,  
547 and blood tests including blood count, electrolyte, kidney function, and liver  
548 function tests. Some estimates suggest that up to 52% of radiology and  
549 laboratory tests produce incidental findings, and that rate may increase with  
550 advances in technology.

551

552 Studies of specific cascades using national administrative claims data also  
553 suggest that these cascades can be costly – in one example by Ganguli et al,  
554 cascades following pre-operative electrocardiograms for cataract surgery  
555 cost ten times the initial electrocardiograms (ECGs). A recent national study  
556 of US internists conducted by Ganguli et al. also found that almost all  
557 responding physicians had experienced cascades after incidental findings  
558 that did not lead to clinically meaningful outcomes yet caused physical,  
559 psychological, or other harms to patients or the physicians themselves.  
560 Although some of these cascades may eventually reveal clinically important  
561 findings, more often they find nothing significant. This is especially true  
562 when the initial test is discretionary or even known to be of low-value, as in  
563 the example of pre-operative ECGs for cataract surgery. It is likely that few  
564 patients are aware of the potential for cascades or risk of false positives  
565 when making the decision with their clinicians to proceed with medical  
566 tests.

567

568 Despite the prevalence and burden of care cascades, little effort has been  
569 devoted to addressing them. Consideration of care cascades have not been  
570 incorporated into best practices for shared decision-making and we are not



571 aware of any interventions that have been developed or evaluated to  
572 educate patients or clinicians on the financial or psychological risk of  
573 care cascades.

574

## 575 **RESEARCH DESIGN AND METHODS**

576 Briefly describe study design and anticipated enrollment, i.e., number of subjects to be enrolled  
577 by researchers study-wide and by Partners researchers. Provide a brief summary of the  
578 eligibility criteria (for example, age range, gender, medical condition). Include any local site  
579 restrictions, for example, "Enrollment at Partners will be limited to adults although the  
580 sponsor's protocol is open to both children and adults."

581

582 **Design:** During Phase I, we will implement a user-centered design process  
583 to develop the educational content and implementation strategy for the  
584 intervention. Specifically, we will conduct focus groups with patients and  
585 clinicians in which we iteratively solicit feedback on the language and  
586 dissemination of text/email-based messages and interactive content for  
587 patients, on references and peer comparison emails for physicians, and on  
588 survey items for both.

589

590 In Phase II, we will randomize 20 primary care physicians to intervention  
591 and control arms, recruit at least 10 and up to 20 patients per physician with  
592 upcoming wellness visits, and implement our intervention. We will collect  
593 pre- and post-intervention surveys of patients and physicians, as well as  
594 post-study interviews of patients and physicians. In phase III, we will use  
595 mixed methods analysis to study the data collected in Phase II.

596

597 **Enrollment:** For Phase I, we will recruit up to 27 patients for the patient  
598 advisory committee and interviews and up to 20 practicing BWH primary  
599 care physicians for interviews.

600

601 For phase II, we will recruit 20 BWH primary care physicians who actively  
602 see patients and meet our inclusion criteria (based on patient-deidentified  
603 electronic health record data on test ordering rates during annual physicals).  
604 We will then recruit at least 10 patients for each of these PCPs. We will allow  
605 up to 20 patients per physician in the enrollment phase to ensure adequate  
606 sampling in case of loss to follow-up. All patients of the selected PCPs who  
607 are at least 18 years old, speak English, have access to email, and have not

608 opted-out of receiving research invitations from Mass General Brigham are  
609 eligible to participate.

610

611 Briefly describe study procedures. Include any local site restrictions, for example, “Subjects  
612 enrolled at Partners will not participate in the pharmacokinetic portion of the study.” Describe  
613 study endpoints.

614

615 In phase I, we will develop a multi-pronged intervention for patients and  
616 clinicians. To this end, we will work with the BWH Center for Patients and  
617 Families to select and convene a 5-15 member patient advisory council. We  
618 will host two focus groups with this council, aided by discussion guides, to  
619 first identify key issues and then to suggest refinements to our intervention.

620

621 We will also recruit both patients and physicians for in-depth interviews. We  
622 will recruit up to 20 primary care physicians through the Patient-Based  
623 Research Network (PBRN) and suggestions from clinic medical directors. We  
624 will recruit up to 20 patients through the above Patient Advisory Council and  
625 the Rally platform. We will conduct up to 20 in-depth interviews each with  
626 these physicians and patients to understand their experiences with cascades  
627 and to cognitively test survey items.

628

629 Finally, we will review patient educational materials, clinician references, and  
630 clinician peer comparison emails with clinic leaders for their approval.

631

632 In phase II, we will work with clinic leaders in the BWH PBRN to recruit 20  
633 physicians who have not previously been involved. We will select these  
634 physicians from among those who fall above the 25<sup>th</sup> percentile of test  
635 ordering rates during annual physicals. We will use matched pair  
636 randomization by testing rate and gender to randomize these PCPs to the  
637 control or intervention arms. For each physician, we will identify at least 10  
638 of their patients who are scheduled for a physical in the next 6 months and  
639 meet our inclusion criteria. We will recruit them using patient portal  
640 messages.

641

642 Intervention arm: We will send emails to physicians with feedback on how  
643 they compare to their peers in aggregate on test ordering during annual

644 physicals, along with links to the physician-facing materials. We will not  
645 share identifiable data with a given physician on their peer physicians. One  
646 to two days before their visit, we will send patients educational materials via  
647 text and email.

648

649 Control arm: One to two days before their visit, we will send patients general  
650 information on visit preparation.

651

652 We will perform an exploratory chart review analysis of visits in the  
653 intervention and control arms to assess any documentation of discussion  
654 about medical testing and ordering of medical tests. Specifically, we will  
655 record physical visit note details on medical test conversations and medical  
656 tests ordered. This will help us understand if the intervention may have  
657 influenced ordering practices.

658

659 **NOTE:** We acknowledge that during the COVID-19 pandemic, clinical  
660 operations have changed drastically to protect both patients and health care  
661 workers. For instance, routine wellness visits have been cancelled or  
662 converted to virtual. Given our commitment to protect the safety and  
663 welfare of our study subjects and staff, and to avoid disrupting clinic  
664 operations during this challenging time, we plan to conduct phase I of our  
665 study virtually and to begin the intervention phase only once it is deemed  
666 safe and feasible to do so.

667

668

669 For studies involving treatment or diagnosis, provide information about standard of care at  
670 Partners (e.g., BWH, MGH) and indicate how the study procedures differ from standard care.  
671 Provide information on available alternative treatments, procedures, or methods of diagnosis.

672

673 Treatment and diagnosis are not part of this protocol.

674

675 Describe how risks to subjects are minimized, for example, by using procedures which are  
676 consistent with sound research design and which do not unnecessarily expose subjects to risk  
677 or by using procedures already being performed on the subject for diagnostic or treatment  
678 purposes.

679

680 There are no known risks to participating in this study. Patient and clinician  
681 subjects may voluntarily participate and withdraw at any time.

682

683 There is a theoretical risk of breach of data confidentiality and that PHI could  
684 become known to unauthorized persons, but we will take all steps necessary  
685 to protect PHI (see below). To mitigate this risk, we will follow all compliance  
686 and data confidentiality procedures for research at Partners. Specifically, we  
687 will use procedures consistent with sound research design and which do not  
688 expose subjects to unnecessary risk. Data monitoring will be conducted  
689 regularly (see below). All data analyzed will be de-identified and reported in  
690 aggregate.

691

692 Describe explicitly the methods for ensuring the safety of subjects. Provide objective criteria  
693 for removing a subject from the study, for example, objective criteria for worsening  
694 disease/lack of improvement and/or unacceptable adverse events. The inclusion of objective  
695 drop criteria is especially important in studies designed with placebo control groups.

696

697 **This is a minimal risk study.** There is no known physical or medical safety  
698 threat to patient or clinician subjects who participate. Furthermore,  
699 participation is voluntary and all subjects will be informed that they may opt-  
700 out any time (see below). Given the minimal risk to subjects, our data safety  
701 and monitoring procedures, and the relatively small sample size, we do not  
702 plan on having drop criteria.

703

#### 704 **FORESEEABLE RISKS AND DISCOMFORTS**

705 Provide a brief description of any foreseeable risks and discomforts to subjects. Include those  
706 related to drugs/devices/procedures being studied and/or administered/performed solely for  
707 research purposes. In addition, include psychosocial risks, and risks related to privacy and  
708 confidentiality. When applicable, describe risks to a developing fetus or nursing infant.

709

710 **For patient and clinician subjects, there are no known risks to**  
711 **participating in our data collection activities.** There is a potential risk of  
712 physicians feeling psychological discomfort in knowing their test ordering  
713 rates. We will mitigate this by offering an option if they have concerns to  
714 speak with clinic leaders about these concerns. The main risks are breach of

715 confidentiality and privacy of information shared. Every effort will be made  
716 to maintain confidentiality and privacy of information shared and collected  
717 and subsequent data analysis (see below), and efforts will be made to  
718 minimize the duration of data collection activities.

719

## 720 **EXPECTED BENEFITS**

721 Describe both the expected benefits to individual subjects participating in the research and the  
722 importance of the knowledge that may reasonably be expected to result from the study. Provide  
723 a brief, realistic summary of potential benefits to subjects, for example, “It is hoped that the  
724 treatment will result in a partial reduction in tumor size in at least 25% of the enrolled subjects.”  
725 Indicate how the results of the study will benefit future patients with the disease/condition being  
726 studied and/or society, e.g., through increased knowledge of human physiology or behavior,  
727 improved safety, or technological advances.

728

729 Individual subjects may benefit by learning about (and, if appropriate,  
730 avoiding) possible downstream consequences of medical testing, and having  
731 their physicians become more informed about these consequences and how  
732 to discuss them. Future patients will benefit through improved knowledge of  
733 a possible intervention to facilitate patient-clinician conversations about  
734 cascades that may in turn help to reduce their negative effects.

735

## 736 **EQUITABLE SELECTION OF SUBJECTS**

737 The risks and benefits of the research must be fairly distributed among the populations that  
738 stand to benefit from it. No group of persons, for example, men, women, pregnant women,  
739 children, and minorities, should be categorically excluded from the research without a good  
740 scientific or ethical reason to do so. Please provide the basis for concluding that the study  
741 population is representative of the population that stands to potentially benefit from this  
742 research.

743

744 Our goal will be to enroll eligible patients whose characteristics are  
745 representative of the entire population of eligible patients. We will  
746 specifically target patients of all genders and a range of ages,  
747 race/ethnicities, and education levels.

748

749 When people who do not speak English are excluded from participation in the research, provide  
750 the scientific rationale for doing so. Individuals who do not speak English should not be denied  
751 participation in research simply because it is inconvenient to translate the consent form in  
752 different languages and to have an interpreter present.

753

754 We will approach English-speaking patients only. The scientific rationale for  
755 this limitation is because the intervention will be available in English in this

756 early stage of development. All clinician subjects caring for patients at BWH  
757 speak English.

758

759 For guidance, refer to the following Partners policy:  
760 Obtaining and Documenting Informed Consent of Subjects who do not Speak English  
761 [https://partnershealthcare-public.sharepoint.com/ClinicalResearch/Non-](https://partnershealthcare-public.sharepoint.com/ClinicalResearch/Non-English_Speaking_Subjects.1.10.pdf)  
762 [English\\_Speaking\\_Subjects.1.10.pdf](https://partnershealthcare-public.sharepoint.com/ClinicalResearch/Non-English_Speaking_Subjects.1.10.pdf)

763

764

765

766 **RECRUITMENT PROCEDURES**

767 Explain in detail the specific methodology that will be used to recruit subjects. Specifically  
768 address how, when, where and by whom subjects will be identified and approached about  
769 participation. Include any specific recruitment methods used to enhance recruitment of  
770 women and minorities.

771

772 For phase I, we will recruit the PAC and physician focus groups as described  
773 above.

774

775 For phase II, we will recruit physicians as described above. Eligible patient  
776 subjects will then be identified by research assistants trained in the  
777 protection of human subjects based on upcoming appointment using  
778 “minimum necessary” information in the EHR. To meet recruitment criteria,  
779 patients must not have opted out of receiving Mass General Brigham (MGB)  
780 research invitations. The research assistant will send the patient recruitment  
781 list and a letter created using the template provided by the MGB IRB to the  
782 DHeCare Research Team to create a letter project. Following project  
783 creation, the research assistant will send patients a letter through the  
784 patient portal. The letter includes an email address and phone number that  
785 allows patients to opt out. The letter also includes a link to REDCAP which  
786 will include an electronic consent form with information sheet, invitation to  
787 enroll, and the baseline survey.

788

789 Provide details of remuneration, when applicable. Even when subjects may derive medical  
790 benefit from participation, it is often the case that extra hospital visits, meals at the hospital,  
791 parking fees or other inconveniences will result in additional out-of-pocket expenses related to  
792 study participation. Investigators may wish to consider providing reimbursement for such  
793 expenses when funding is available

794

795 Patient subjects in both arms will be compensated \$10 at the completion of  
796 the study. Physician subjects will be compensated \$50 for the whole study.

797

798 For guidance, refer to the following Partners policies:

799 Recruitment of Research Subjects

800 [https://partnershealthcare-](https://partnershealthcare-public.sharepoint.com/ClinicalResearch/Recruitment_Of_Research_Subjects.pdf)  
801 [public.sharepoint.com/ClinicalResearch/Recruitment\\_Of\\_Research\\_Subjects.pdf](https://partnershealthcare-public.sharepoint.com/ClinicalResearch/Recruitment_Of_Research_Subjects.pdf)

802  
803 Guidelines for Advertisements for Recruiting Subjects

804 [https://partnershealthcare-](https://partnershealthcare-public.sharepoint.com/ClinicalResearch/Guidelines_For_Advertisements.1.11.pdf)  
805 [public.sharepoint.com/ClinicalResearch/Guidelines\\_For\\_Advertisements.1.11.pdf](https://partnershealthcare-public.sharepoint.com/ClinicalResearch/Guidelines_For_Advertisements.1.11.pdf)

806  
807 Remuneration for Research Subjects

808 [https://partnershealthcare-](https://partnershealthcare-public.sharepoint.com/ClinicalResearch/Remuneration_for_Research_Subjects.pdf)  
809 [public.sharepoint.com/ClinicalResearch/Remuneration\\_for\\_Research\\_Subjects.pdf](https://partnershealthcare-public.sharepoint.com/ClinicalResearch/Remuneration_for_Research_Subjects.pdf)

810

811

## 812 **CONSENT PROCEDURES**

813 Explain in detail how, when, where, and by whom consent is obtained, and the timing of  
814 consent (i.e., how long subjects will be given to consider participation). For most studies  
815 involving more than minimal risk and all studies involving investigational drugs/devices, a  
816 licensed physician investigator must obtain informed consent. When subjects are to be  
817 enrolled from among the investigators' own patients, describe how the potential for coercion  
818 will be avoided.

819

820 In phase I, eligible physician subjects will be informed about our research  
821 initiative via email and patients via RALLY. Prior to participation in  
822 interviews, we will confirm verbal consent. Specifically, these subjects will be  
823 informed that: 1) participation is voluntary—they may stop the interview at  
824 any time, and 2) data collected will be analyzed and reported in aggregate.

825

826 In phase II, potential patient subjects will be informed as part of the patient  
827 portal message and the REDCAP link that it will contain. This information will  
828 contain the purpose of the study, risks/benefits, methods of ensuring  
829 confidentiality, and voluntary nature of participation. Specifically, patient  
830 subjects will be informed that: 1) participation is voluntary—they may  
831 withdraw at any time; 2) a decision to not participate will in no way affect  
832 their care at BWH; 3) information shared will remain confidential and used  
833 only for research purposes; and 4) data collected will be analyzed and  
834 reported in aggregate. We will not request verbal consent as this will be

835 prohibitively burdensome for this minimal risk study and because this study  
836 does not share any personal health information with the patients.  
837  
838

839 NOTE: When subjects are unable to give consent due to age (minors) or impaired decision-  
840 making capacity, complete the forms for Research Involving Children as Subjects of Research  
841 and/or Research Involving Individuals with Impaired Decision-making Capacity, available on the  
842 New Submissions page on the PHRC website:

843 <https://partnershealthcare.sharepoint.com/sites/phrmApply/aieipa/irb>  
844

845 For guidance, refer to the following Partners policy:

846 Informed Consent of Research Subjects:

847 [https://partnershealthcare-](https://partnershealthcare-public.sharepoint.com/ClinicalResearch/Informed_Consent_of_Research_Subjects.pdf)  
848 [public.sharepoint.com/ClinicalResearch/Informed\\_Consent\\_of\\_Research\\_Subjects.pdf](https://partnershealthcare-public.sharepoint.com/ClinicalResearch/Informed_Consent_of_Research_Subjects.pdf)

849

850

851

## 852 **DATA AND SAFETY MONITORING**

853 Describe the plan for monitoring the data to ensure the safety of subjects. The plan should  
854 include a brief description of (1) the safety and/or efficacy data that will be reviewed; (2) the  
855 planned frequency of review; and (3) who will be responsible for this review and for  
856 determining whether the research should be altered or stopped. Include a brief description of  
857 any stopping rules for the study, when appropriate. Depending upon the risk, size and  
858 complexity of the study, the investigator, an expert group, an independent Data and Safety  
859 Monitoring Board (DSMB) or others might be assigned primary responsibility for this monitoring  
860 activity.

861

862 NOTE: Regardless of data and safety monitoring plans by the sponsor or others, the principal  
863 investigator is ultimately responsible for protecting the rights, safety, and welfare of subjects  
864 under his/her care.

865

866 The principal investigator and research assistant/project coordinator will  
867 monitor data collection activities, maintain data integrity and quality control,  
868 protect the rights, safety, and welfare of study subjects, and adhere to  
869 standards set by the Partners IRB. All data will be stripped of PHI and  
870 electronic data will be kept on a secured shared file area (SFA) behind the  
871 Partners firewall with anti-virus software or Partners Research Computing  
872 approved cloud storage services. Data about consented patients will also be



873 stored behind the RAND Corporation firewall in accordance with the terms of  
874 the consent. Any paper forms and/or audio recordings will be destroyed after  
875 being transcribed into electronic format. Monitoring will be performed on a  
876 monthly basis during the study period and will include a review of  
877 enrollment, data analysis, and breaches of confidentiality, and any adverse  
878 events that may occur. Any adverse events will be graded as to their  
879 attribution to the intervention and reported according to IRB guidelines. The  
880 principal investigator will review any complaints reported from patient and  
881 physician subjects. These will be reported to the Partners IRB annually or  
882 immediately if the complaint is serious. Given the minimal risk of the study,  
883 we are not planning to use automatic stopping rules or a DSMB. We  
884 emphasize that this study does not involve any invasive procedures.

885

886 Describe the plan to be followed by the Principal Investigator/study staff for review of adverse  
887 events experienced by subjects under his/her care, and when applicable, for review of sponsor  
888 safety reports and DSMB reports. Describe the plan for reporting adverse events to the sponsor  
889 and the Partners' IRB and, when applicable, for submitting sponsor safety reports and DSMB  
890 reports to the Partners' IRBs. When the investigator is also the sponsor of the IND/IDE, include  
891 the plan for reporting of adverse events to the FDA and, when applicable, to investigators at  
892 other sites.

893

894 NOTE: In addition to the adverse event reporting requirements of the sponsor, the principal  
895 investigator must follow the Partners Human Research Committee guidelines for Adverse Event  
896 Reporting

897

898 Voluntary participation in data collection activities are not expected to cause  
899 adverse events to patient or physician subjects. However, if an adverse  
900 event occurs, the principal investigator will follow PHS HRC guidelines for  
901 adverse event reporting.

902

### 903 **MONITORING AND QUALITY ASSURANCE**

904 Describe the plan to be followed by the principal investigator/study staff to monitor and assure  
905 the validity and integrity of the data and adherence to the IRB-approved protocol. Specify who  
906 will be responsible for monitoring, and the planned frequency of monitoring. For example,  
907 specify who will review the accuracy and completeness of case report form entries, source  
908 documents, and informed consent.

909

910 NOTE: Regardless of monitoring plans by the sponsor or others, the principal investigator is  
911 ultimately responsible for ensuring that the study is conducted at his/her investigative site in

912 accordance with the IRB-approved protocol, and applicable regulations and requirements of the  
913 IRB.

914

915 The principal investigator and research assistant/project coordinator will  
916 monitor and assure the validity and integrity of the data collection and  
917 adherence to the procedures outlined in this protocol. They will review the  
918 study database on a monthly basis, ensuring data integrity, accuracy, and  
919 completeness. The principal investigator will supervise the research  
920 assistant/project coordinator in all data collection activities over the course  
921 of the study.  
922

923 For guidance, refer to the following Partners policies:

924 Data and Safety Monitoring Plans and Quality Assurance  
925 [https://partnershealthcare-](https://partnershealthcare-public.sharepoint.com/ClinicalResearch/DSMP_in_Human_Subjects_Research.pdf)  
926 [public.sharepoint.com/ClinicalResearch/DSMP in Human Subjects Research.pdf](https://partnershealthcare-public.sharepoint.com/ClinicalResearch/DSMP_in_Human_Subjects_Research.pdf)

927

928 Reporting Unanticipated Problems (including Adverse Events)

929 [https://partnershealthcare-](https://partnershealthcare-public.sharepoint.com/ClinicalResearch/Reporting_Unanticipated_Problems_including_Adverse_Events.pdf)  
930 [public.sharepoint.com/ClinicalResearch/Reporting Unanticipated Problems including Adverse Even](https://partnershealthcare-public.sharepoint.com/ClinicalResearch/Reporting_Unanticipated_Problems_including_Adverse_Events.pdf)  
931 [ts.pdf](https://partnershealthcare-public.sharepoint.com/ClinicalResearch/Reporting_Unanticipated_Problems_including_Adverse_Events.pdf)

932

933

934

## 935 **PRIVACY AND CONFIDENTIALITY**

936 Describe methods used to protect the privacy of subjects and maintain confidentiality of data  
937 collected. This typically includes such practices as substituting codes for names and/or medical  
938 record numbers; removing face sheets or other identifiers from completed  
939 surveys/questionnaires; proper disposal of printed computer data; limited access to study data;  
940 use of password-protected computer databases; training for research staff on the importance of  
941 confidentiality of data, and storing research records in a secure location.  
942

943 NOTE: Additional measures, such as obtaining a Certificate of Confidentiality, should be  
944 considered and are strongly encouraged when the research involves the collection of sensitive  
945 data, such as sexual, criminal or illegal behaviors.

946

947 All information from individuals or entities in the course of this study that  
948 identifies an individual or entity will be treated as confidential in accordance  
949 with section 903c of the Public Health Service Act (42 U.S.C.299a-1). This  
950 will be done by keeping all personal identifiers in a separate location from  
951 the data, and only approved research personnel and study investigators  
952 trained in the protection of human subjects will have access to the linked  
953 data. All research staff will be properly trained in the importance of  
954 confidentiality of data.

955  
956 All electronic data and files will be stored on a password-protected database  
957 in a shared file area (SFA) on a Partners password-protected computer  
958 behind the Partners firewall with anti-virus software or on Partners Research  
959 Computing approved cloud storage services. Data about consented patients  
960 will also be stored behind the RAND Corporation firewall in accordance with  
961 the terms of the consent. Patients' identifiers and other data collected on  
962 paper will be kept in locked filing cabinets. Data collection instruments used  
963 during the project and stored on laptop or desktop computers will also be  
964 password protected. Printed computer data with PHI will be shredded and  
965 disposed of upon completion of the study and any record-keeping  
966 requirements. Any identifiers will be removed prior to any analysis and all  
967 results will be presented in aggregate. The principal investigator will be  
968 responsible for the confidentiality and security of all study databases. These  
969 measures should be effective in preventing breaches of confidentiality.  
970

971 **SENDING SPECIMENS/DATA TO RESEARCH COLLABORATORS OUTSIDE**  
972 **PARTNERS**

973 Specimens or data collected by Partners investigators will be sent to research collaborators  
974 outside Partners, indicate to whom specimens/data will be sent, what information will be sent,  
975 and whether the specimens/data will contain identifiers that could be used by the outside  
976 collaborators to link the specimens/data to individual subjects.

977

978 No specimens or data will be sent to anyone outside of BWH.

979

980 Specifically address whether specimens/data will be stored at collaborating sites outside  
981 Partners for future use not described in the protocol. Include whether subjects can withdraw  
982 their specimens/data, and how they would do so. When appropriate, submit documentation of  
983 IRB approval from the recipient institution.

984

985 Not applicable.

986

987 **RECEIVING SPECIMENS/DATA FROM RESEARCH COLLABORATORS OUTSIDE**  
988 **PARTNERS**

989 When specimens or data collected by research collaborators outside Partners will be sent to  
990 Partners investigators, indicate from where the specimens/data will be obtained and whether  
991 the specimens/data will contain identifiers that could be used by Partners investigators to link  
992 the specimens/data to individual subjects. When appropriate, submit documentation of IRB  
993 approval and a copy of the IRB-approved consent form from the institution where the  
994 specimens/data were collected.

995

996 No specimens or data will be received from anyone outside of BWH.

997

998

## 999 **Statistical Analysis Plan**

1000

### 1001 **Measures**

1002 **Outcomes:** The primary outcome will be the Shared Decision-Making Process survey  
1003 (SDMP\_4 score), a 4 item measure that is validated as a patient-reported outcome performance  
1004 measure. Each response will be scored as binary and added for a range of 0-4. Patient-level  
1005 secondary outcomes will be presence of a testing discussion, satisfaction with the testing  
1006 discussion, presence of a discussion of next steps, whether the doctor explained tests in a way  
1007 that was easy to understand, and patient knowledge (a score of 0-4 based on correct responses  
1008 to each of 4 knowledge survey items). Patient-level exploratory outcomes will include patients'  
1009 survey responses about which tests were discussed, who raised the idea of tests, and the  
1010 importance of various factors in testing decisions. Physician-level exploratory outcomes will  
1011 include the importance of various factors in testing decisions, consideration of patient out-of-  
1012 pocket costs in clinical decisions, self-reported discussion with patients about false positives,  
1013 incidental findings, and cascades, and barriers to cascade conversations.

1014

1015 Among intervention group patients, we will use server log data to count how many viewed the  
1016 website. This will produce a lower-bound estimate as some participants may copy-paste the link  
1017 without the code to view the website, preventing us from tracking those views.

1018

1019 **Physician characteristics:** Time since residency, gender, race, ethnicity, time in outpatient  
1020 practice, and prior experience with cascades (all from pre-study survey).

1021

1022 **Patient characteristics:** Age, gender, race, ethnicity, education (from pre-study survey),  
1023 primary insurance (from electronic health record), time with PCP (from post-study survey),  
1024 approach to medical action, decision-making preferences, and health literacy (from pre-study  
1025 survey).

1026

### 1027 **Quantitative Analysis**

1028 Our primary analysis will be Intention to Treat with multiple imputation of missing outcomes. We  
1029 will summarize all data using simple descriptive statistics (means with standard deviations for  
1030 continuous variables and frequencies with percentages for categorical variables) overall and in  
1031 each arm. We will compare baseline characteristics between physicians in each group using t-  
1032 tests and chi-square tests as appropriate and accounting for clustering by matched pair and by  
1033 physician nested within matched pair. We will then summarize and compare baseline  
1034 characteristics among 1) all enrolled patients in each group, 2) enrolled patients in each group  
1035 with missing post-study surveys, and 3) enrolled patients in each group who completed post-  
1036 study surveys (final sample), using t-tests and chi square tests as appropriate and clustering  
1037 standard errors by matched pair and by physician nested within matched pair.

1038

1039 To estimate differences between intervention and control groups in our primary and secondary  
1040 outcomes, we will use linear regression models (generalized estimating equations (GEE))  
1041 adjusted for patient age, gender, race/ethnicity, and education (because these covariates may  
1042 be associated with the primary outcome) and any additional baseline covariates in the model  
1043 that exhibit significant differences ( $p < 0.05$ ) between groups. We will also include standard errors  
1044 clustered by matched pair and by physician nested within matched pair. Linear regression using

1045 GEE to compare mean scores between treatment and control groups is robust to non-normality  
1046 of the outcomes.

1047  
1048 We estimate that we will have >80% power to detect a 0.5 standard deviation difference in the  
1049 SDMP\_4 measure between the intervention and control arms based on an expected sample of  
1050 200 patient-visits and a 2-sided type I error rate of 5% and assuming intra-cluster correlation  
1051 coefficient (ICC) for patients from the same physician of 0.05.

1052  
1053 *Exploratory analysis of the primary outcome:* To explore how the effect of the intervention on the  
1054 primary and secondary outcomes varies within relevant population strata, we will repeat these  
1055 analyses after stratifying patients by physician gender (male vs female), time with PCP  
1056 (dichotomized), and health care preferences (wait and see vs taking action, make decisions vs  
1057 defer decisions).

1058  
1059 *Analysis of patient-level exploratory outcomes* – We will build GEE linear models with  
1060 adjustment as described above.

1061  
1062 *Analysis of physician-level exploratory outcomes* – We will use paired t-tests to compare  
1063 intervention and control group physicians on pre-post differences in their responses to survey  
1064 items on factors in testing decisions, consideration of patient out-of-pocket costs; self-reported  
1065 discussion with patients about false positives, incidental findings, and cascades; and barriers to  
1066 cascade conversations.

1067  
1068 We will use R statistical software for data analysis and consider 2-sided P values to be  
1069 significant at <0.05.

### 1070 1071 **Qualitative Analysis**

1072 We will transcribe patient and physician interviews and will use an inductive thematic approach  
1073 to analyze these qualitative data. Specifically, study authors will develop a code book, code the  
1074 data using deductive (based on the interview guides) and inductive (based on categories that  
1075 emerge during analysis) methods, resolve coding differences by consensus, and identify key  
1076 categories and themes.

1077  
1078  
1079
