# Supplementary material for: Effect of a Peer Comparison and Educational Intervention on Medical Test Conversation Quality: A Randomized Clinical Trial
Source: PubMed Central journal article supplement (PMC10636635; doi:10.1001/jamanetworkopen.2023.42464), 2023-11-09
Supplement: jamanetwopen-e2342464-s003.pdf [file jamanetwopen-e2342464-s003.pdf]

## Data Sharing Statement

Ganguli. Effect of a Peer Comparison and Educational Intervention on Medical Test Conversation Quality. *JAMA Netw Open*. Published November 14, 2023.  
doi:10.1001/jamanetworkopen.2023.42464

### Data

**Data available:** Yes

**Data types:** Deidentified participant data, Data dictionary

**How to access data:** Requests for data should be sent to the corresponding author at [iganguli@bwh.harvard.edu](mailto:iganguli@bwh.harvard.edu).

**When available:** With publication

### Supporting Documents

**Document types:** None

### Additional Information

**Who can access the data:** We will make the data available to researchers whose proposed use has been approved.

**Types of analyses:** Data will be made available for research purposes only.

**Mechanisms of data availability:** Data will be made available after approval of a proposal.
